# Supplementary material for: Hypoxia Induced by Cobalt Chloride Triggers Autophagic Apoptosis of Human and Mouse Drug‐Resistant Glioblastoma Cells through Targeting the PI3K‐AKT‐mTOR Signaling Pathway
Source: Hindawi journal article supplement (doi:10.1155/2021/5558618), 2021-01-01

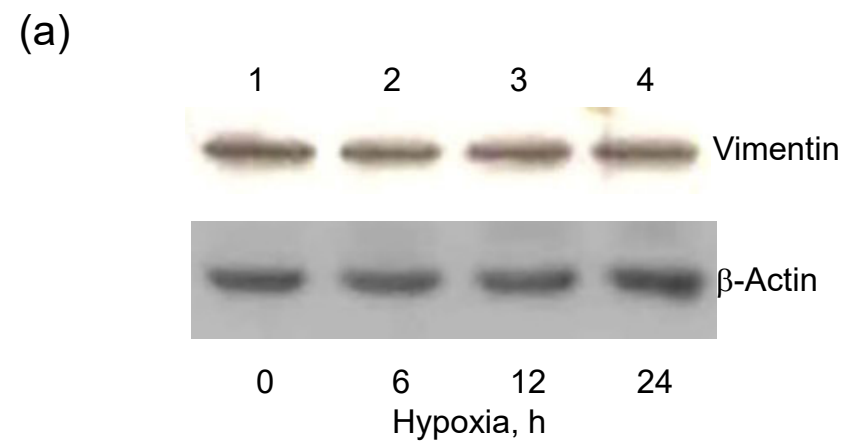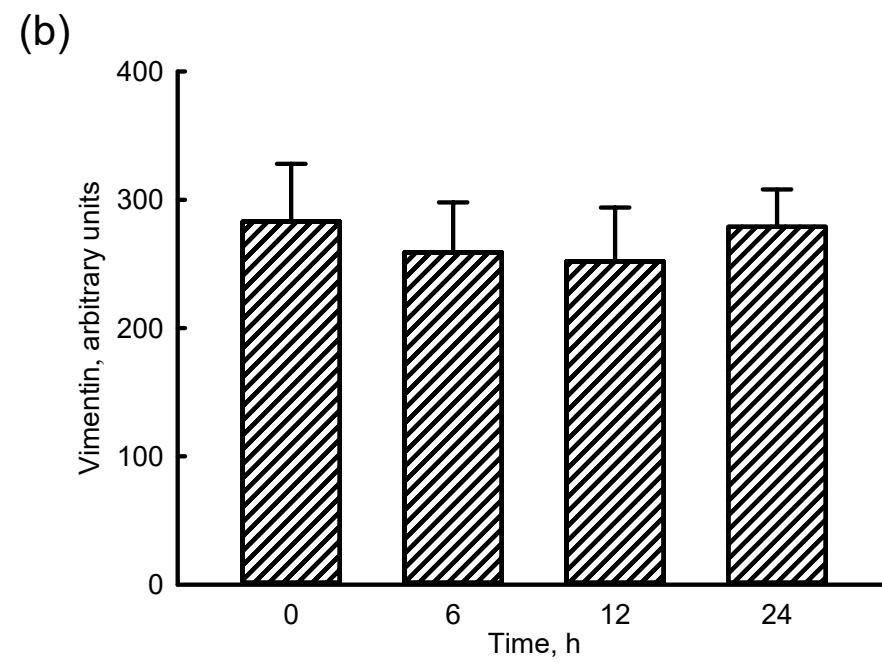

Supplement: f1 [file 5558618.f1.pdf]
